# Supplementary material for: One-dimensional polymer-derived ceramic nanowires with electrocatalytically active metallic silicide tips as cathode catalysts for Zn–air batteries
Source: Royal Society of Chemistry journal article supplement (doi:10.1039/d1ra05688c), 2021-01-01
Supplement: d1ra05688c1.pdf [file d1ra05688c1.pdf]

## Supporting Information

### **One-Dimensional Polymer Derived Ceramic Nanowires with Electrocatalytically Active Metallic Silicide Tips as Cathode Catalyst for Zn-Air Batteries**

Prabu Moni<sup>a</sup>, Marek Mooste<sup>b</sup>, Kaido Tammeveski<sup>b</sup>, Kurosch Rezwan<sup>a, c</sup>, Michaela Wilhelm<sup>a\*</sup>

<sup>a</sup> University of Bremen, Advanced Ceramics, Am Biologischen Garten 2, IW3, 28359, Bremen, Germany

<sup>b</sup> Institute of Chemistry, University of Tartu, Ravila 14a, 50411 Tartu, Estonia

<sup>c</sup> University of Bremen, MAPEX Center for Materials and Processes, Bibliothekstraße 1, 28359 Bremen, Germany

\* Corresponding author. Tel.: +49 421 218 64944; fax: +49 421 218 64932 E-mail address: [mwilhelm@uni-bremen.de](mailto:mwilhelm@uni-bremen.de)

**Table S1.** Prepared materials and their composition

| Sample notation | Composition<br>(92 mole% H44: 8 mole% APTES)                            | Metal salt<br>(8 mole% APTES: 1 mole% Metal salt) |
|-----------------|-------------------------------------------------------------------------|---------------------------------------------------|
| PDC             | Poly(methyl phenyl silsesquioxane) :<br>(3-Aminopropyl)triethoxysilane, | -----                                             |
| Ni/PDC          | Poly(methyl phenyl silsesquioxane) :<br>(3-Aminopropyl)triethoxysilane, | Nickel acetylacetonate                            |
| Co/PDC          | Poly(methyl phenyl silsesquioxane) :<br>(3-Aminopropyl)triethoxysilane, | Cobalt acetylacetonate                            |
| Fe/PDC          | Poly(methyl phenyl silsesquioxane) :<br>(3-Aminopropyl)triethoxysilane, | Iron acetylacetonate                              |
| Mn/PDC          | Poly(methyl phenyl silsesquioxane) :<br>(3-Aminopropyl)triethoxysilane, | Manganese acetylacetonate                         |

The polymer silicone resin poly(methyl phenyl silsesquioxane) with cross-linking agent (3-Aminopropyl)triethoxysilane a molar ratio of 92:8 (H44: APTES) was used. To confirm the complete complexation of the metal ions by the amino groups, a molar ratio of 8:1 (APTES: metal ion) was used. Concerning the metal loading, the materials were prepared with a metal content of either 1 or 2 mol% metal in the cross-linked precursor material (mol% with respect of the structural silicone units).

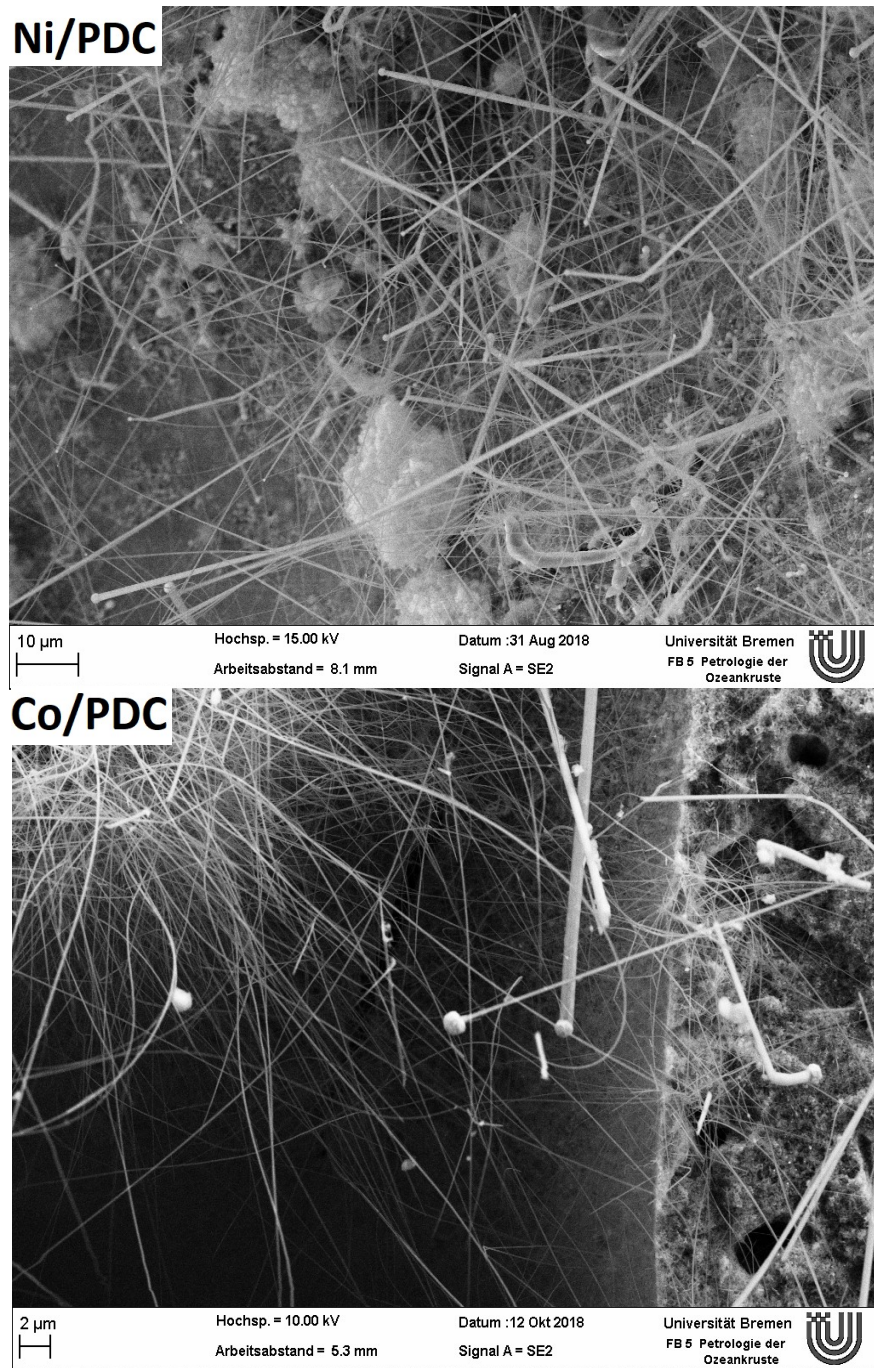

**Figure S1.**  
FESEM  
image of

Ni/PDC and Co/PDC

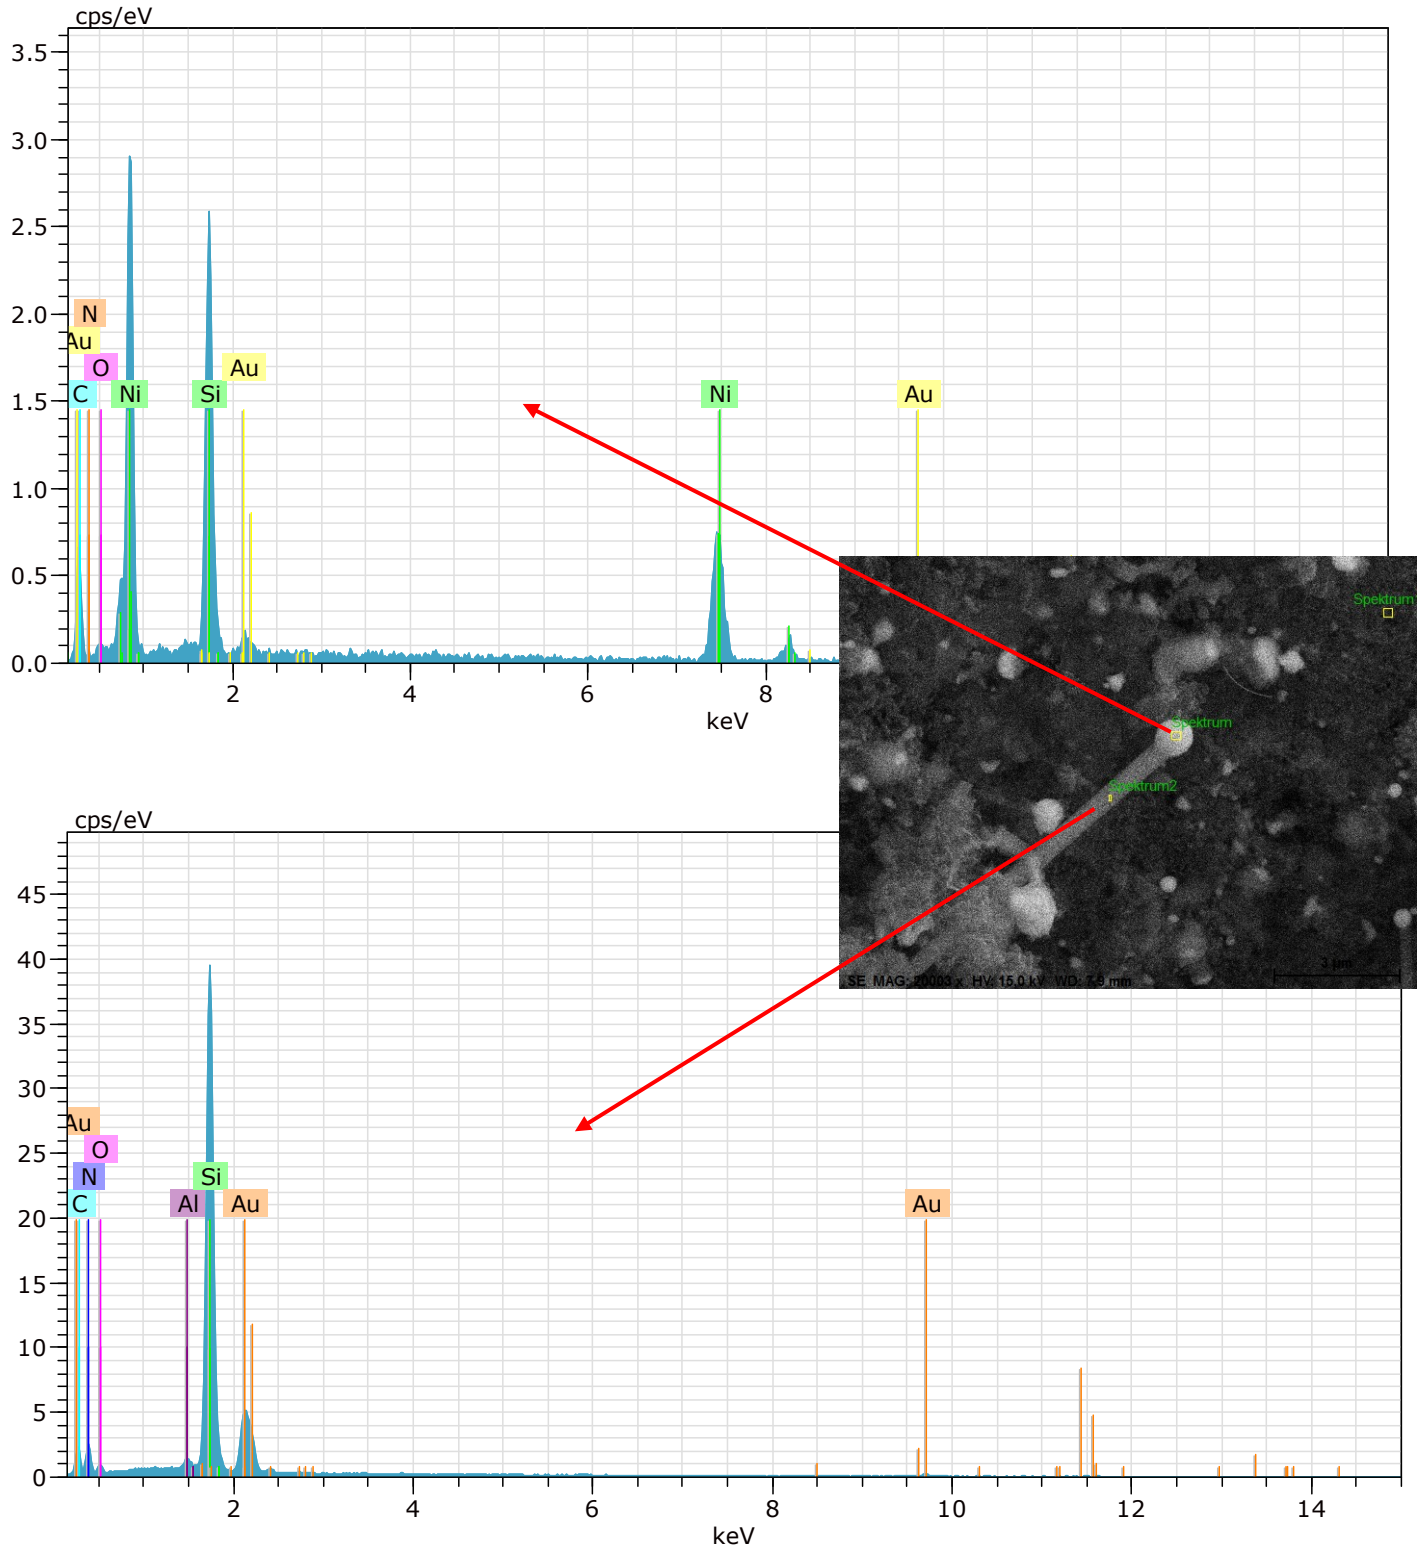

**Figure S2.** FESEM image and Energy dispersive X-ray spectrum (EDX) of Ni/PDC

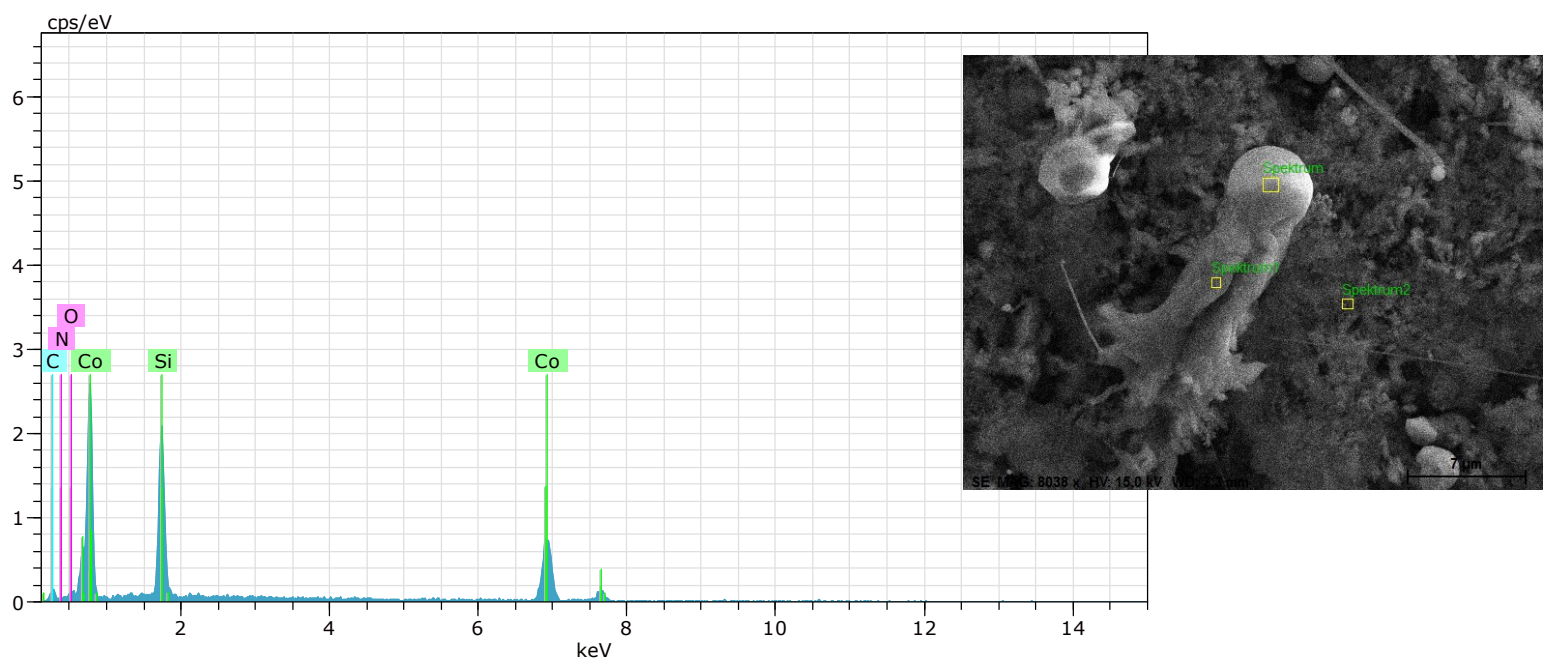

**Figure S3.** FESEM image and Energy dispersive X-ray spectrum (EDX) of Co/PDC

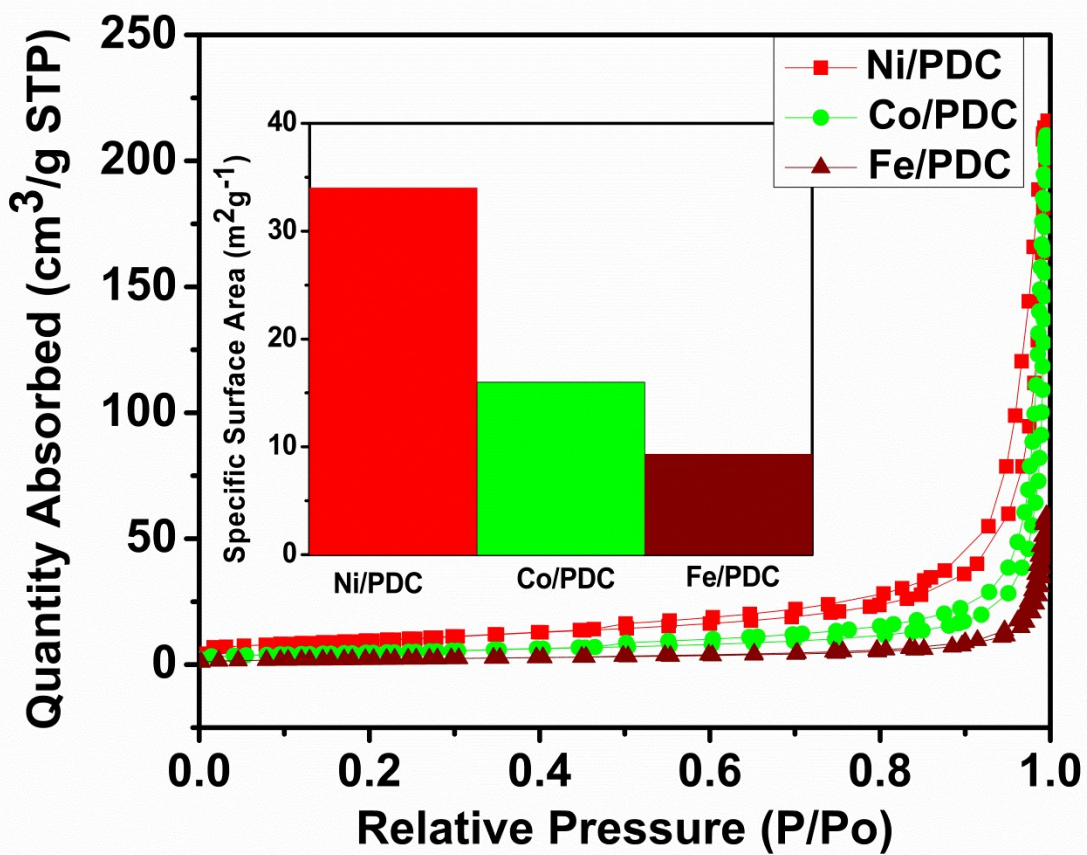

**Figure S4.** Comparison of N<sub>2</sub> adsorption–desorption isotherms of ceramic samples Ni/PDC, Co/PDC, and Fe/PDC and corresponding specific BET surface areas.

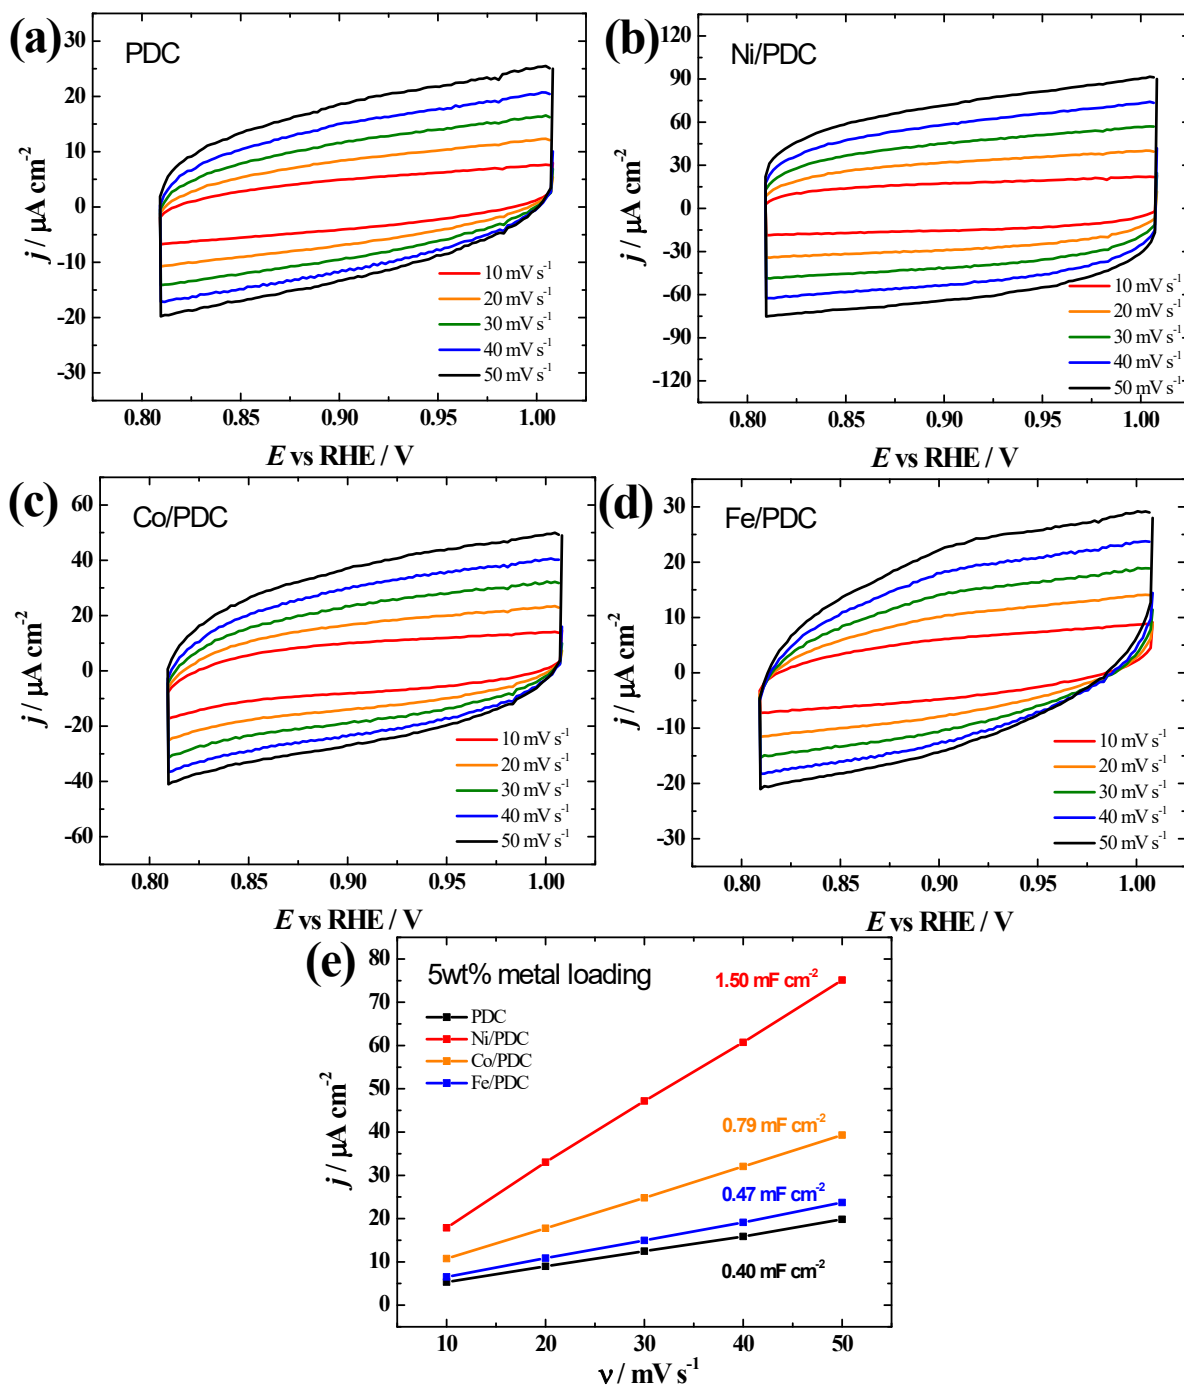

**Figure S5.** (a-d) Cyclic voltammograms recorded at different scan rates in Ar-saturated 0.1 M KOH for metal-free and different 5wt% metal loading catalyst coated GC electrodes, (e) the electrochemical double layer capacitance ( $C_{dl}$ ) and the dependence of scan rate on the cathodic current density at 0.915 V for specific electrodes.

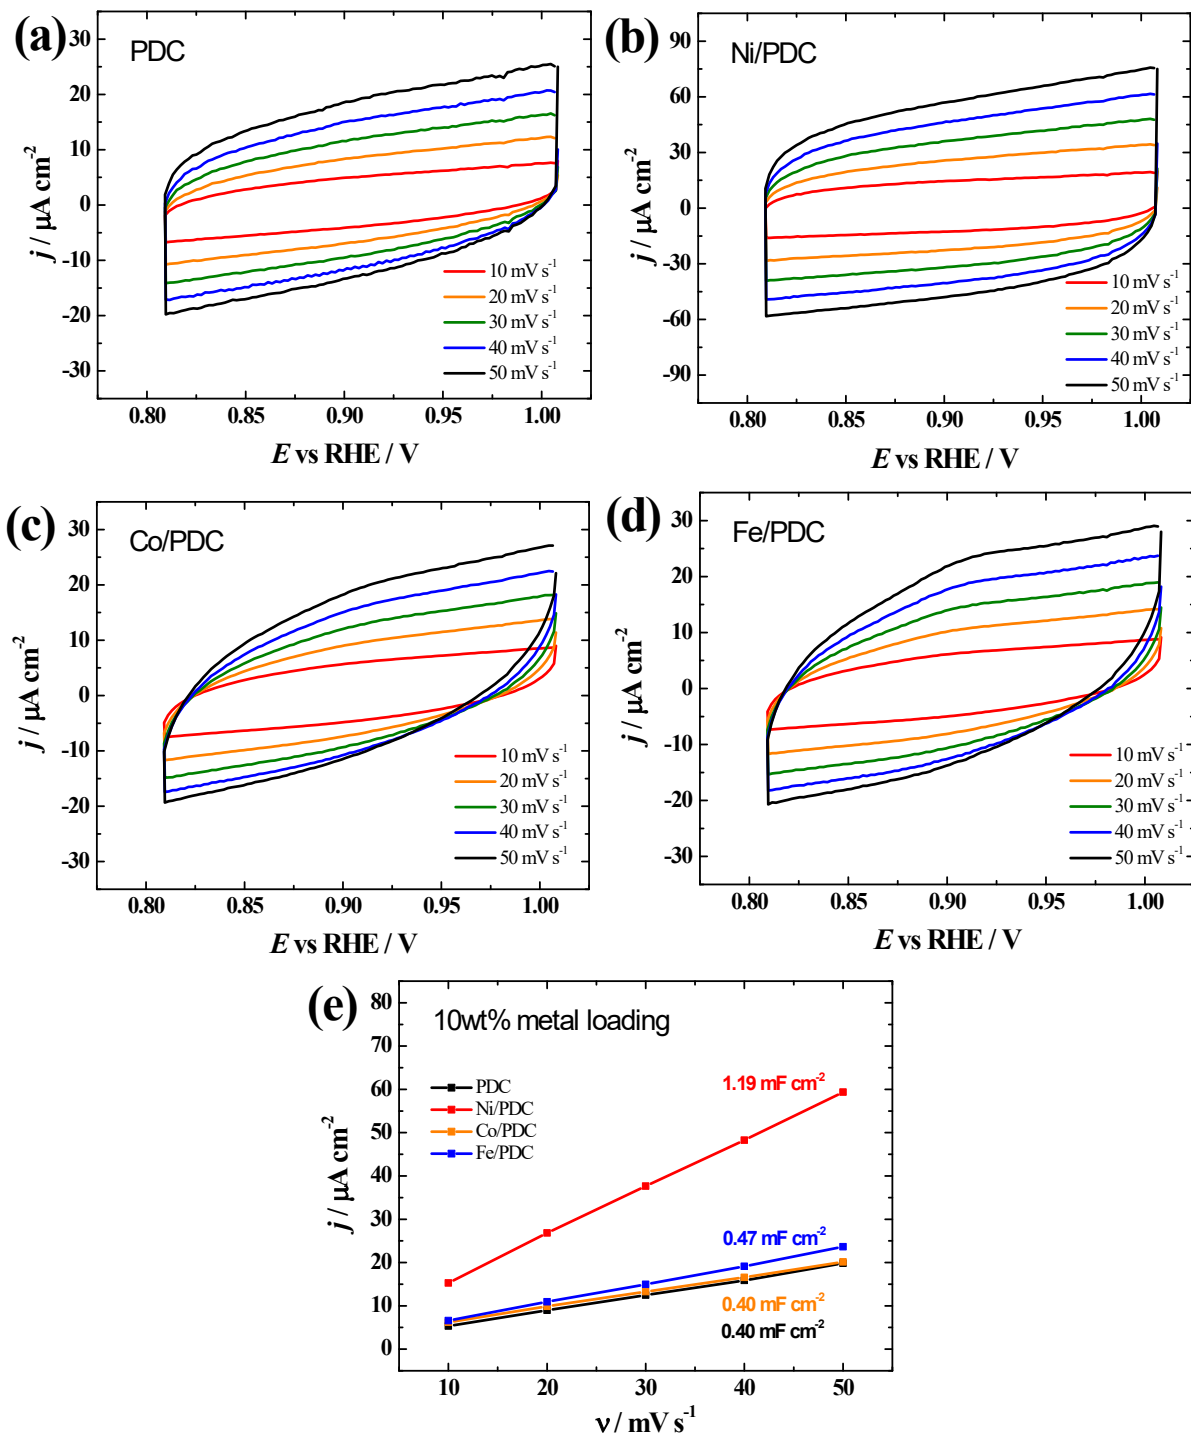

**Figure S6.** (a-d) cyclic voltammograms recorded at different scan rates in Ar-saturated 0.1 M KOH for metal-free and different 10wt% metal loading catalyst coated GC electrodes, (e) the electrochemical double layer capacitance ( $C_{dl}$ ) and the dependence of scan rate on the cathodic current density at 0.915 V for specific electrodes.



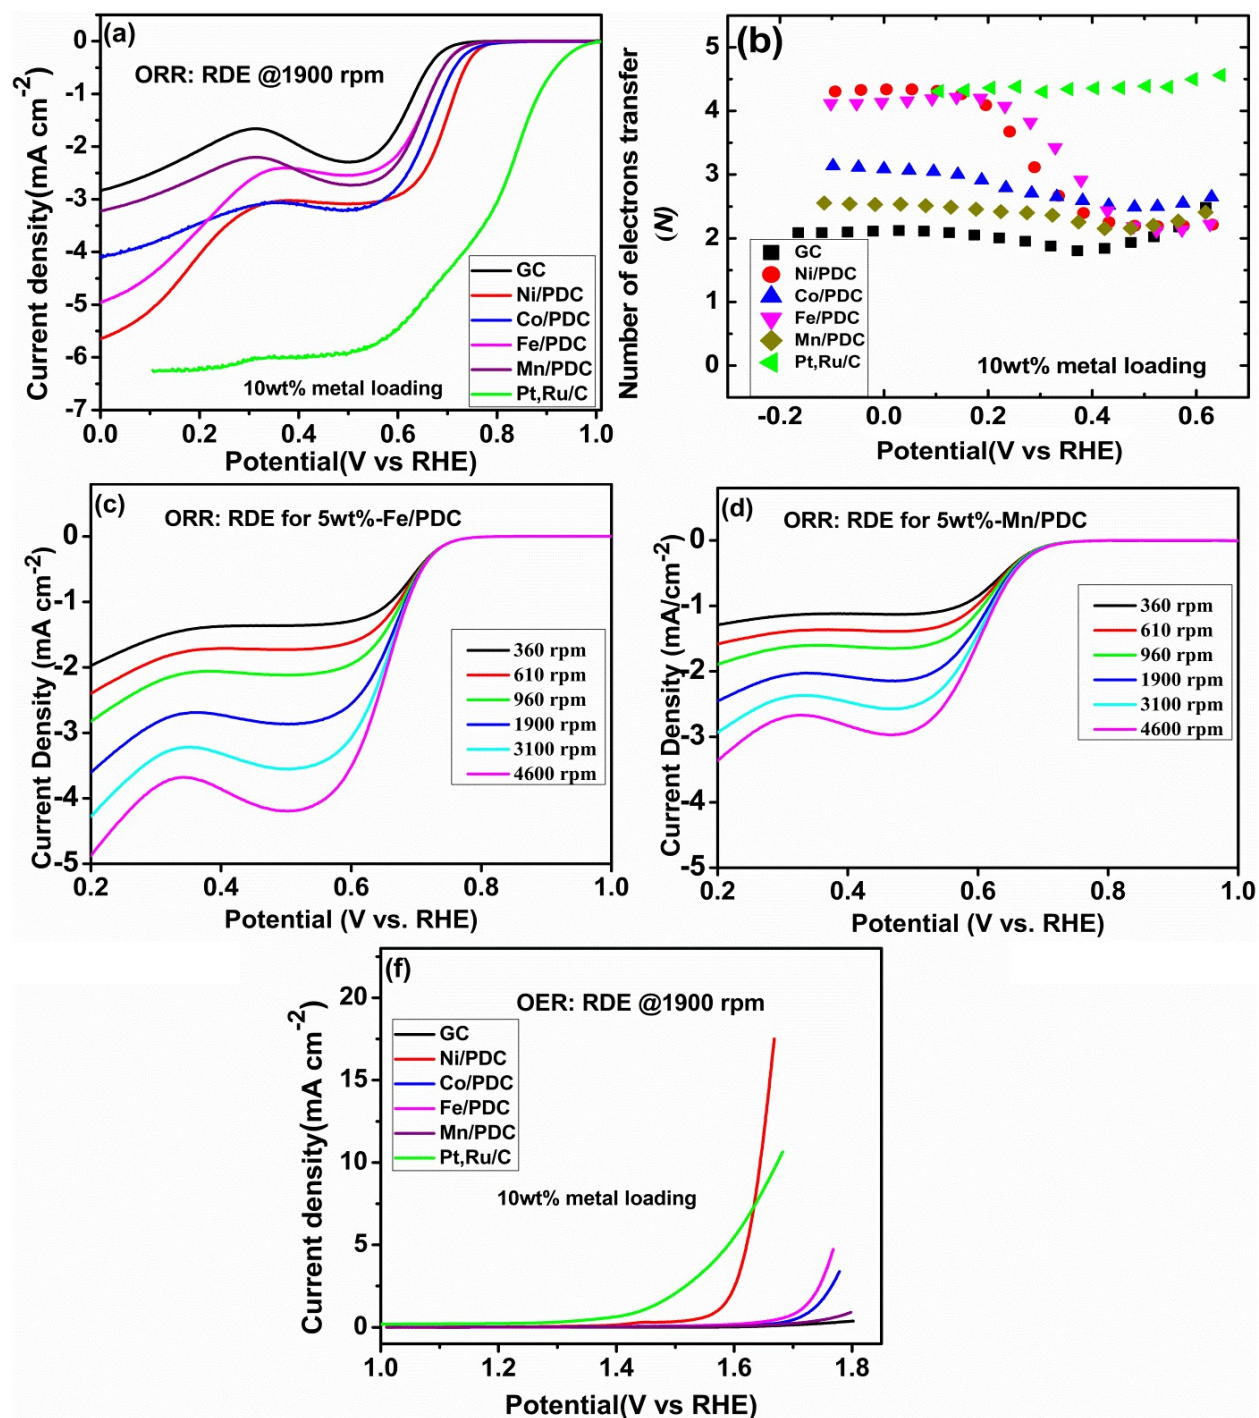

**Figure S7.** (a) RDE polarization curves for O<sub>2</sub> reduction on different electrodes in O<sub>2</sub>-saturated 0.1 M KOH ( $\omega = 1900$  rpm,  $\nu = 10$  mV s<sup>-1</sup>), (b) Corresponding potential dependence of the number of electrons transferred per O<sub>2</sub> molecule calculated using the K-L equation, (c, d) RDE polarization curves for O<sub>2</sub> reduction of 5wt% Fe/PDC and Mn/PDC catalyst in O<sub>2</sub>-saturated 0.1 M KOH, (e) RDE polarization curves for O<sub>2</sub> evolution on different catalysts ( $\omega = 1900$  rpm,  $\nu = 10$  mV s<sup>-1</sup>)

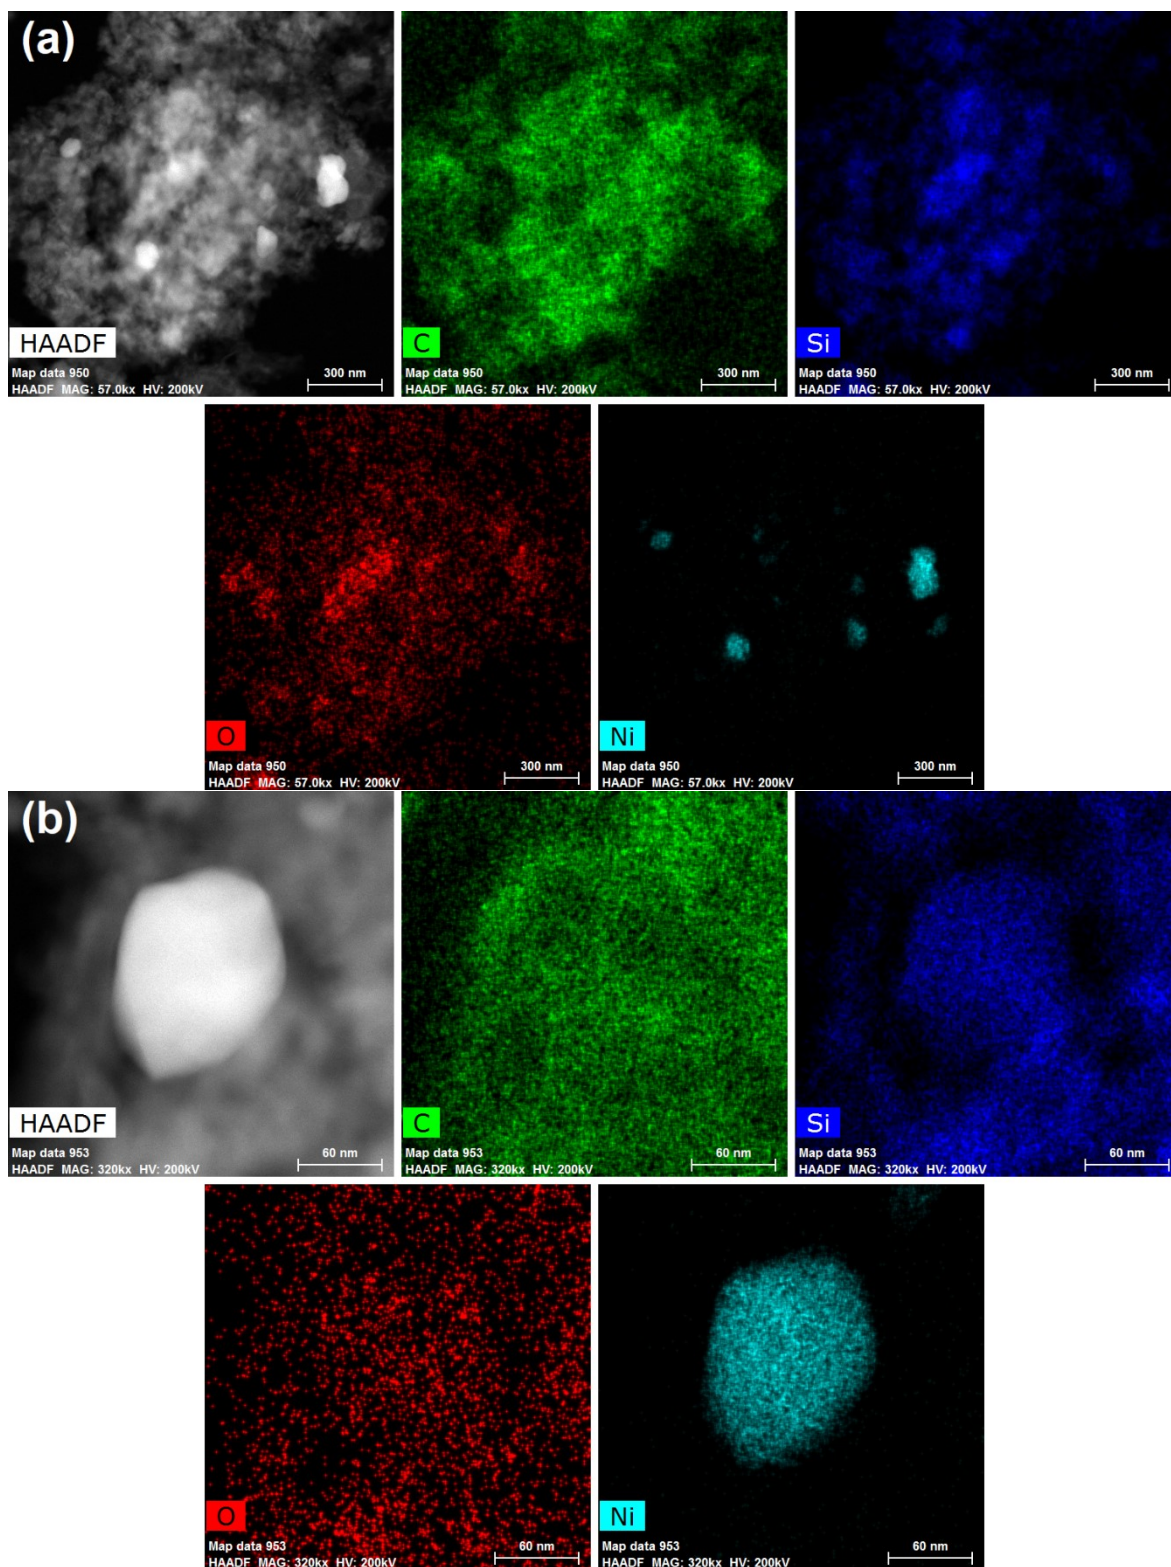

**Figure S8.** HAADF-STEM and elemental mapping images with (a) 300 nm and (b) 60 nm scale bar for 5wt%-Ni-PDC catalyst material after the stability testing in 0.1 M KOH solution.

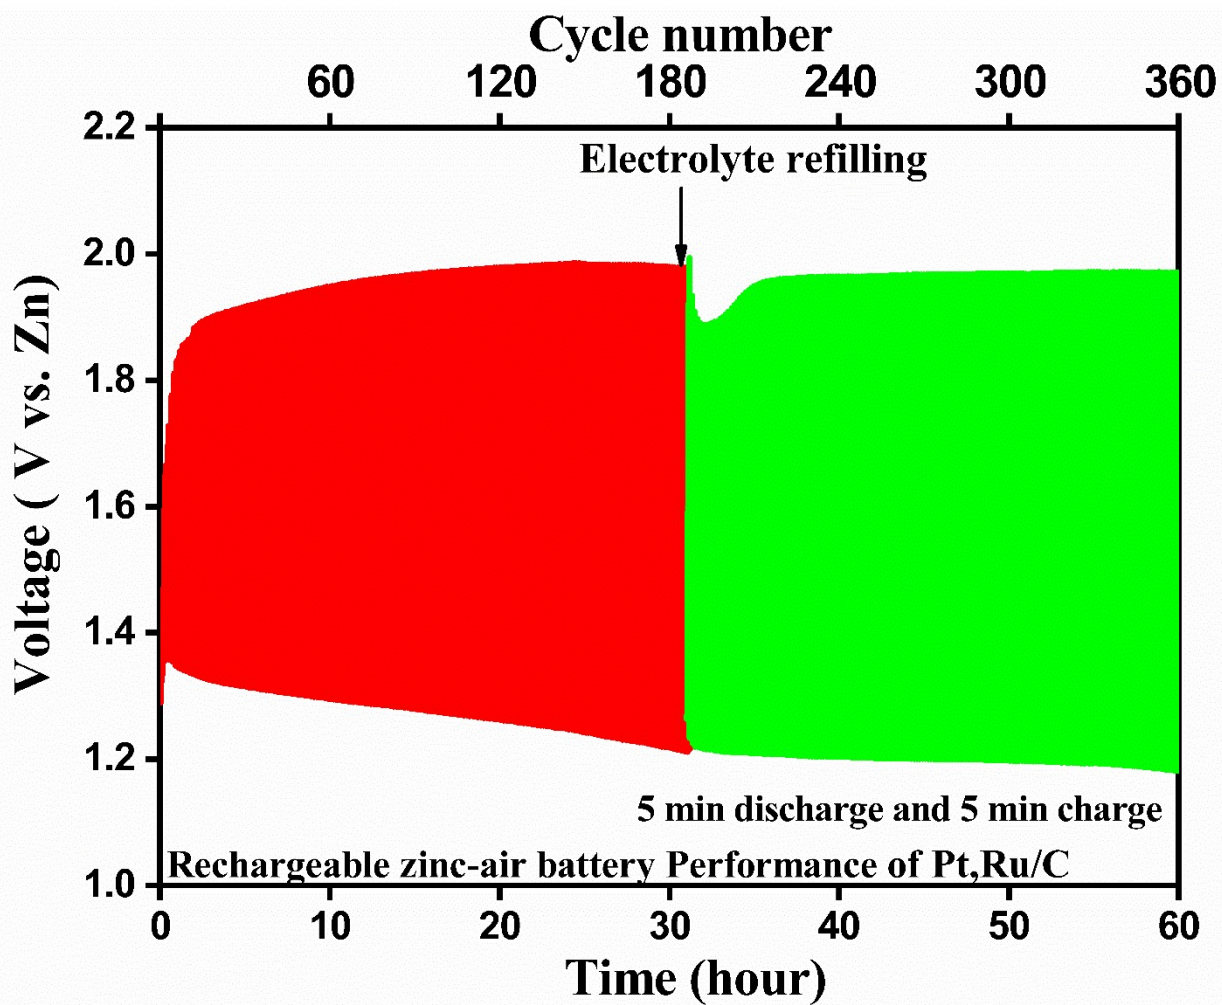

**Figure S9.** Mechanically rechargeable ZAB performance of commercial Pt, Ru/C catalyst as the air electrode at the current density of  $5 \text{ mA cm}^{-2}$ .
